# Supplementary material for: Monolithic organic/inorganic ternary nanohybrids toward electron transfer cascade for enhanced visible-light photocatalysis
Source: Royal Society of Chemistry journal article supplement (doi:10.1039/c5ra01219h), 2015-01-01
Supplement: c5ra01219h1.pdf [file c5ra01219h1.pdf]

## Electronic Supporting Information

### Monolithic Organic/Inorganic Ternary Nanohybrids toward Electron Transfer Cascade for Enhanced Visible-Light Photocatalysis

Yingzhi Chen,<sup>a,b</sup> Mengbin Yue,<sup>c</sup> Zheng-Hong Huang,<sup>\*b</sup> Lu-Ning Wang<sup>a</sup> and Feiyu Kang<sup>b</sup>

<sup>a</sup> School of Materials Science and Engineering, University of Science and Technology Beijing, Beijing, 100083, PR China

<sup>b</sup> Key Laboratory of Advanced Materials (MOE), School of Materials Science and Engineering, Tsinghua University, Beijing 100084, PR China

<sup>c</sup> School of Chemical and Environmental Engineering, China University of Mining and Technology, Beijing 100083, PR China

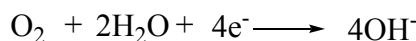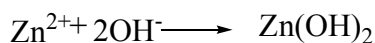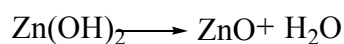

**Fig. S1.** The growing mechanism of ZnO NRs on CNF surface.

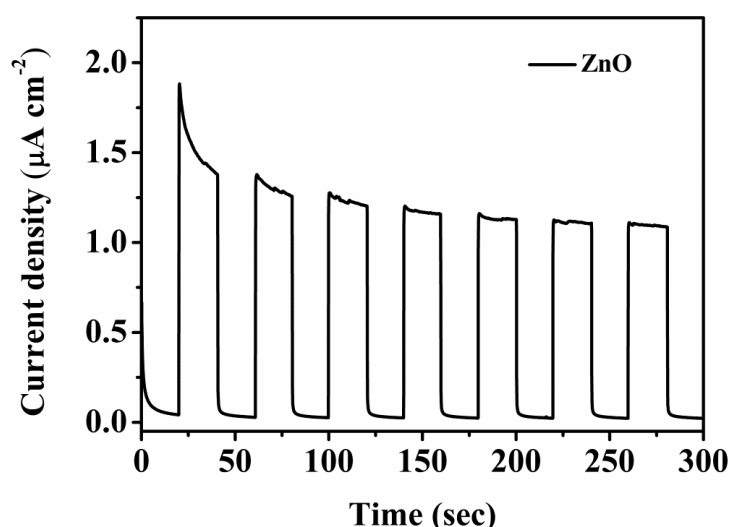

**Fig. S2.** Photocurrent response curves of ZnO NRs.

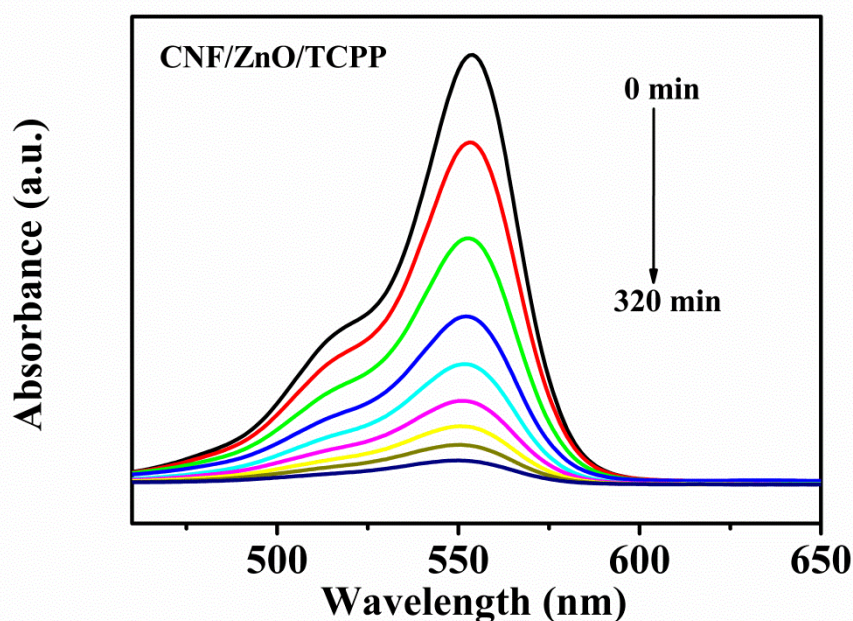

**Fig. S3.** UV-Vis absorption spectra of RhB vs. photoreaction time over CNF/ZnO/TCPP hybrid catalysts ( $\lambda_{\text{irradiation}} > 400 \text{ nm}$ ).

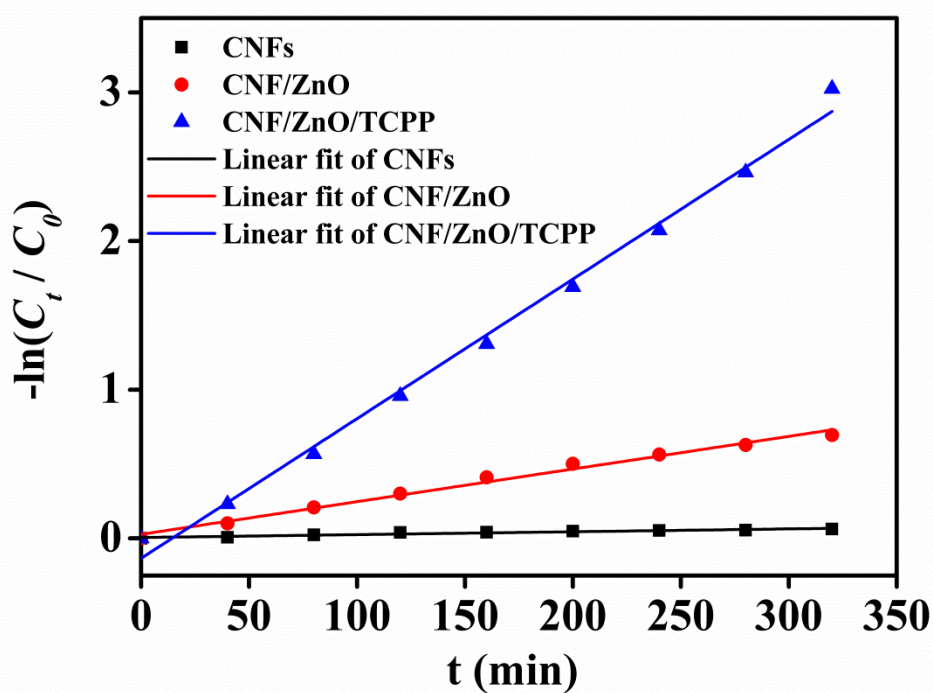

**Fig. S4** Fitting results of photodegrading RhB according to the Langmuir–Hinshelwood model ( $\lambda_{\text{irradiation}} > 400 \text{ nm}$ ), where  $C_t$  is the concentration of RhB at the irradiation time  $t$  and  $C_0$  is the concentration of RhB in the absorption equilibrium before irradiation.

**Table S1.** Rate constant ( $k$ ), the degradation rate ( $r$ ), and the photonic efficiency ( $\eta$ ) of RhB in different monolithic systems.

| System       | $k^a$ (*10 <sup>3</sup> min <sup>-1</sup> ) | $r^b$ (*10 <sup>8</sup> mol l <sup>-1</sup> min <sup>-1</sup> ) | $\eta^c$ (*10 <sup>4</sup> ) |
|--------------|---------------------------------------------|-----------------------------------------------------------------|------------------------------|
| CNF          | 0.193                                       | 0.2                                                             | 0.03                         |
| CNF/ZnO      | 2.2                                         | 2.29                                                            | 0.38                         |
| CNF/ZnO/TCPP | 9.39                                        | 9.78                                                            | 1.63                         |

<sup>a</sup> The slope of the pseudo-first-order linear line in Fig. S3.

<sup>b</sup>  $\pm$  10%.

<sup>c</sup>  $\eta = r/I_0$ , where  $I_0$  is the incident photon flux, here  $I_0 \approx 6 \cdot 10^{-4}$  Einstein l<sup>-1</sup> min<sup>-1</sup>.
